# Supplementary material
Source: Springer Nature journal article supplement (https://www.springermedizin.de/resource/supplementary/12913_2013_2630_MOESM1_ESM.pdf/9532220)

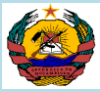

# COMO ESTÃO OS DADOS NA SUA UNIDADE SANITÁRIA?

O estudo “Avaliação de quatro indicadores de rotina dos cuidados de saúde na província de Sofala” tem como objectivo avaliar os dados de rotina de 2010 de quatro indicadores do Sistema de Informação da Saúde. Cada ano para os próximos quatro anos, uma equipa irá as mesmas U.S. para recolher os dados.

Recolheu-se dados de quatro indicadores dos cuidados primários de saúde do ano 2010:

1. Nº de partos institucionais
2. Nº de primeira consulta pré-natal
3. Nº de consultas externas
4. Nº de 3ª dose de DPT-HepB-Hib

Depois, comparou-se a concordância dos dados e fez-se um ordenamento das U.S. segundo a concordância de dados. As U.S. estão ordenadas numericamente de primeira a última posição.

| 2010        |                   |    |
|-------------|-------------------|----|
| Distrito    | Unidade Sanitária |    |
| Nhamatanda  | CS Tica           | 1  |
| Machanga    | CS Inharingue     | 2  |
| Muanza      | CS Galinha        | 2  |
| Beira       | CS Chingussura    | 3  |
| Caia        | CS Murema         | 4  |
| Marromeu    | CS Chueza         | 5  |
| Beira       | CS Ponta Gêa      | 6  |
| Chemba      | PS Catulene       | 6  |
| Chibabava   | HR Muxunguê       | 7  |
| Chibabava   | CS Mangunde       | 7  |
| Gorongosa   | CS Mucodza        | 7  |
| Búzi        | CS Bândua         | 8  |
| Chemba      | CS Chemba         | 9  |
| Cheringoma  | CS Mazamba        | 10 |
| Dondo       | CS Savane         | 11 |
| Nhamantanda | HR Nhamatanda     | 12 |
| Cheringoma  | CS Inhaminga      | 13 |
| Maringuê    | CS Canxixe        | 14 |
| Búzi        | HR Búzi           | 15 |
| Machanga    | CS Machanga       | 16 |
| Marromeu    | HR Marromeu       | 17 |
| Dondo       | CS Dondo          | 18 |
| Gorongosa   | CS Gorongosa      | 19 |
| Caia        | CS Caia           | 20 |
| Maringuê    | CS Maringuê       | 20 |
| Muanza      | CS Muanza         | 21 |

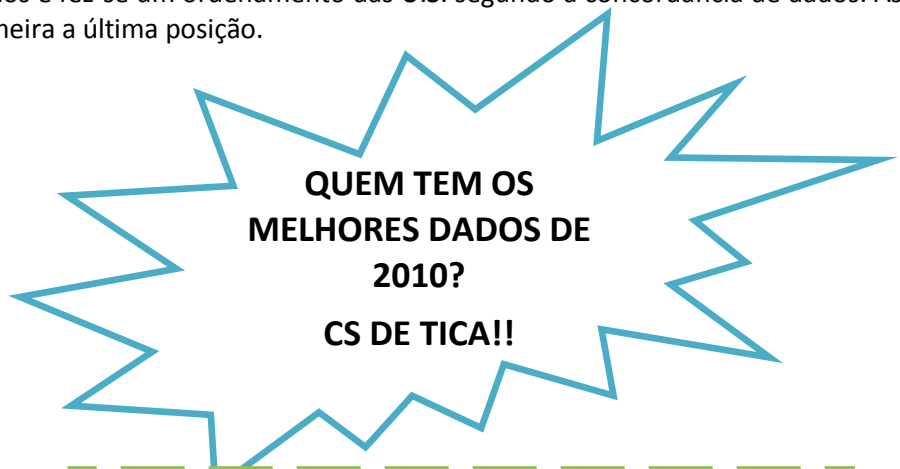

**QUAIS U.S. ESTÃO DE PARABÊNS EM 2010?**



CS INHARINGUE  
CS GALINHA  
CS CHINGUSSURA  
CS MUREMA

**QUAIS U.S. PRECISAM TRABALHAR MUITO NOS SEUS DADOS?**



CS DONDO  
CS GORONGOSA  
CS CAIA  
CS MARINGUÊ  
CS MUANZA

## COMO PODEM MELHORAR OS DADOS?

- Melhorar o preenchimento do livro de registo de DPT-HepB-Hib
- Arquivar os livros de registo de forma segura e apropriada na U.S. num período de 5 anos
- As U.S. tem que ficar com cópias dos resumos mensais na US, especialmente os C.S. da sede e H.R.
- O NEP Distrital tem que sempre ficar com uma cópia dos dados de Módulo Básico num disco

# AVALIAÇÃO DE QUATRO INDICADORES DE ROTINA DE CUIDADOS DE SAÚDE NA PROVÍNCIA DE SOFALA (2009-2010)

Roxanne Hoek, Titos Quembo, Pires Afonso, Victoria Porthé, Catherine Michel, Julie Cliff, Fátima Cuembelo, Sarah Gimbel, Kenneth Sherr, Aluísio Gonzaga Pio, Francisco Macuácuca, João Luís Manuel, Marina Karigianis

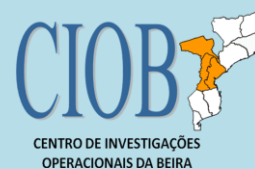

**Introdução:** Este estudo faz parte de um projecto composto por uma parceria de sete anos (2009-2016) entre a Fundação de Caridade Doris Duke (DDCF), Ministério da Saúde (MISAU), Universidade Eduardo Mondlane (UEM), Universidade de Washington (UW) e Health Alliance International (HAI). A parceria tem como objectivo fortalecer os cuidados primários de saúde na província de Sofala. **O objectivo geral** do estudo é: Avaliar os dados de rotina de 2009 e 2010 de quatro indicadores do Sistema de Informação da Saúde.

**Material e Métodos:** Estudo retrospectivo transversal. Recolheu-se dados de quatro indicadores dos cuidados primários de saúde dos anos 2009 e 2010:

1. Nº de partos institucionais
2. Nº de primeira consulta pré-natal
3. Nº de consultas externas
4. Nº de 3ª dose de DPT-HepB-Hib

Os dados foram recolhidos em três níveis do serviço nacional de saúde: Unidade Sanitária (US), Serviço Distrital de Saúde, Mulher e Acção Social (SDSMAS) e a Direcção Provincial de Saúde de Sofala (DPS). Foram seleccionadas 27 US, duas US por cada distrito da província e Hospital Central da Beira. Calculou-se a percentagem de disponibilidade de dados mensais, que significa instrumentos encontrados durante a recolha de dados. Através dum padrão de comparação, fez-se a análise de concordância dos dados. Dividiu-se os meses com dados com margem de erro inferior a 10% pelos meses disponíveis. O resultado representa a percentagem de dados de alta concordância.

## Percentagem Global de Disponibilidade e Concordância Alta, 2009-2010

| Indicadores                  | 2009  | 2010  | Instrumentos                                         | 2009         | 2010         |
|------------------------------|-------|-------|------------------------------------------------------|--------------|--------------|
| <b>Partos Institucionais</b> |       |       | <b>Livro de Registo</b>                              |              |              |
| Disponibilidade              | 88,0% | 89,9% | Disponibilidade                                      | 84,5%        | 94,3%        |
| Alta Concordância            | 87,2% | 93,0% |                                                      |              |              |
|                              |       |       | <b>Resumo Mensal da US</b>                           |              |              |
|                              |       |       | Disponibilidade                                      | 78,6%        | 73,4%        |
| <b>Consultas Externas</b>    |       |       | Alta Concordância ( <i>com livro de registo</i> )    | 49,6%        | 53,1%        |
| Disponibilidade              | 76,2% | 89,0% |                                                      |              |              |
| Alta Concordância            | 61,4% | 72,9% | <b>Resumo Distrital em Papel</b>                     |              |              |
|                              |       |       | Disponibilidade                                      | 64,1%        | 91,7%        |
|                              |       |       | Alta Concordância ( <i>com resumo mensal da US</i> ) | 88,3%        | 93,1%        |
| <b>1ª Consulta Pré-natal</b> |       |       | <b>Resumo Distrital Electrónico</b>                  |              |              |
| Disponibilidade              | 83,1% | 85,8% | Disponibilidade                                      | 97,7%        | 91,4%        |
| Alta Concordância            | 87,8% | 91,5% | Alta Concordância ( <i>com resumo mensal da US</i> ) | 87,0%        | 91,1%        |
|                              |       |       | <b>Resumo Provincial Electrónico</b>                 |              |              |
| <b>3ª Dose DPT-HepB-Hib</b>  |       |       | Disponibilidade                                      | 99,4%        | 98,9%        |
| Disponibilidade              | 89,5% | 89,6% | Alta Concordância ( <i>com resumo mensal da US</i> ) | 89,0%        | 92,3%        |
| Alta Concordância            | 71,5% | 71,6% |                                                      |              |              |
| <b>Total</b>                 |       |       |                                                      |              |              |
| <b>Disponibilidade</b>       |       |       |                                                      | <b>84,3%</b> | <b>88,5%</b> |
| <b>Alta Concordância</b>     |       |       |                                                      | <b>78,4%</b> | <b>82,1%</b> |

**Conclusão:** De forma agregada, houve aumento ligeiro da disponibilidade e concordância dos dados em 2010. Especialmente preocupante é a baixa qualidade de dados ao nível da US, uma vez que é a base (fonte primária) onde se criam os dados. Em particular, precisa-se focar nos dados de DPT-HepB-Hib e consultas externas na US.

### Recomendações:

**US:** Melhorar o preenchimento do livro de registo de DPT-HepB-Hib; Arquivar os livros de registo de forma segura e apropriada na US num período de 5 anos; Todas as US tem que ficar com cópias dos resumos mensais na US, especialmente os CS da sede e HR

**SDSMAS/DPS:** O NEP Distrital tem que sempre ficar com uma cópia dos dados de Módulo Básico num disco; DPS e os SDSMAS deveriam dirigir as suas intervenções dando prioridade as US, especialmente aos HR e CS Tipo I; DPS deveria melhorar a provisão e gestão dos instrumentos utilizados pelo SIS para evitar as ropturas de stock

## Encontre a sua Unidade Sanitária na tabela para ver a progressão de 2009 para 2010!

A tabela mostra o ordenamento das US segundo a disponibilidade e concordância de dados. A mesma está dividida em dois indicadores.

Para a disponibilidade, as US estão organizadas de maior a menor percentagem de disponibilidade. Para a concordância, as US estão ordenadas numericamente de primeira a última posição.

| Partos Institucionais |       |                |       | Consultas Externas |                |      |                |                |       |                |       |      |                |      |                |
|-----------------------|-------|----------------|-------|--------------------|----------------|------|----------------|----------------|-------|----------------|-------|------|----------------|------|----------------|
| % de Disponibilidade  |       |                |       | Concordância       |                |      |                |                |       |                |       |      |                |      |                |
| 2009                  |       | 2010           |       | 2009               |                | 2010 |                | 2009           |       | 2010           |       | 2009 |                | 2010 |                |
| CS Caia               | 100%  | CS Chingussura | 100%  | 1                  | CS Mazamba     | 1    | HR Nhamatanda  | CS Chemba      | 98.3% | CS Inhaminga   | 100%  | 1    | CS Inharingue  | 1    | CS Inharingue  |
| PS Catulene           | 100%  | CS Bândua      | 100%  | 2                  | HR Muxunguê    | 1    | CS Tica        | CS Bândua      | 90.0% | HR Muxunguê    | 100%  | 2    | CS Mazamba     | 2    | CS Galinha     |
| CS Mazamba            | 100%  | CS Chemba      | 100%  | 2                  | CS Canxixe     | 2    | CS Bândua      | HR Búzi        | 86.7% | CS Mangunde    | 100%  | 2    | CS Savane      | 3    | CS Murema      |
| HR Muxunguê           | 100%  | PS Catulene    | 100%  | 3                  | PS Catulene    | 2    | CS Mazamba     | CS Dondo       | 86.7% | CS Muanza      | 100%  | 2    | CS Galinha     | 3    | CS Mazamba     |
| CS Mangunde           | 100%  | CS Mazamba     | 100%  | 3                  | HR Marromeu    | 2    | HR Muxunguê    | HR Muxunguê    | 83.3% | CS Ponta Gêa   | 98.3% | 3    | CS Mangunde    | 3    | CS Savane      |
| CS Canxixe            | 100%  | HR Muxunguê    | 100%  | 4                  | HR Búzi        | 2    | CS Inharingue  | CS Mangunde    | 83.3% | CS Chingussura | 98.3% | 4    | CS Mucodza     | 3    | CS Tica        |
| HR Búzi               | 98.3% | CS Inharingue  | 100%  | 4                  | CS Maringuê    | 3    | CS Mangunde    | HC Beira       | 80.0% | PS Catulene    | 98.3% | 5    | CS Chemba      | 4    | CS Chueza      |
| CS Bândua             | 98.3% | CS Ponta Gêa   | 98.3% | 4                  | CS Chueza      | 4    | CS Ponta Gêa   | CS Mazamba     | 80.0% | CS Inharingue  | 98.3% | 6    | CS Tica        | 5    | PS Catulene    |
| CS Mucodza            | 98.3% | CS Mangunde    | 98.3% | 5                  | CS Bândua      | 4    | CS Chemba      | CS Inhaminga   | 80.0% | CS Galinha     | 98.3% | 7    | CS Bândua      | 6    | CS Inhaminga   |
| CS Maringuê           | 98.3% | CS Savane      | 98.3% | 6                  | CS Chemba      | 4    | CS Mucodza     | CS Inharingue  | 80.0% | CS Tica        | 98.3% | 7    | PS Catulene    | 7    | HR Muxunguê    |
| HR Marromeu           | 98.3% | HR Nhamatanda  | 98.3% | 6                  | CS Inhaminga   | 5    | CS Chingussura | CS Maringuê    | 80.0% | CS Mazamba     | 96.7% | 7    | HR Muxunguê    | 8    | CS Mangunde    |
| CS Galinha            | 98.3% | CS Tica        | 98.3% | 7                  | CS Mangunde    | 5    | CS Murema      | CS Galinha     | 80.0% | CS Chueza      | 96.7% | 7    | CS Machanga    | 9    | CS Chingussura |
| CS Inhaminga          | 96.7% | CS Murema      | 96.7% | 7                  | CS Mucodza     | 5    | CS Galinha     | CS Savane      | 78.3% | HR Nhamatanda  | 96.7% | 8    | CS Muanza      | 9    | CS Mucodza     |
| CS Chueza             | 96.7% | CS Chueza      | 96.7% | 7                  | CS Galinha     | 6    | PS Catulene    | CS Machanga    | 78.3% | CS Savane      | 95.0% | 9    | CS Chueza      | 9    | CS Muanza      |
| CS Murema             | 95.0% | CS Galinha     | 96.7% | 8                  | CS Inharingue  | 7    | CS Savane      | CS Muanza      | 78.3% | CS Murema      | 91.7% | 10   | CS Dondo       | 10   | CS Canxixe     |
| CS Chemba             | 91.7% | CS Mucodza     | 93.3% | 9                  | CS Tica        | 7    | CS Chueza      | HR Nhamatanda  | 78.3% | HR Búzi        | 90.0% | 11   | CS Chingussura | 11   | CS Bândua      |
| CS Muanza             | 90.0% | CS Inhaminga   | 80.0% | 10                 | CS Murema      | 8    | CS Canxixe     | CS Chingussura | 76.7% | CS Mucodza     | 90.0% | 11   | HR Búzi        | 12   | HR Nhamatanda  |
| CS Inharingue         | 85.0% | CS Dondo       | 80.0% | 10                 | HR Nhamatanda  | 9    | HC Beira       | PS Catulene    | 76.7% | CS Bândua      | 80.0% | 12   | HR Nhamatanda  | 13   | HC Beira       |
| CS Savane             | 80.0% | CS Canxixe     | 80.0% | 11                 | CS Ponta Gêa   | 10   | CS Maringuê    | CS Mucodza     | 76.7% | CS Chemba      | 80.0% | 13   | CS Gorongosa   | 14   | CS Ponta Gêa   |
| CS Gorongosa          | 80.0% | HC Beira       | 78.3% | 12                 | CS Savane      | 11   | HR Búzi        | CS Chueza      | 75.0% | CS Machanga    | 80.0% | 14   | CS Ponta Gêa   | 15   | HR Búzi        |
| CS Tica               | 80.0% | CS Caia        | 78.3% | 13                 | CS Chingussura | 12   | CS Gorongosa   | CS Gorongosa   | 73.3% | HR Marromeu    | 80.0% | 14   | HC Beira       | 15   | CS Caia        |
| HR Nhamatanda         | 75.0% | CS Machanga    | 78.3% | 14                 | HC Beira       | 13   | CS Caia        | CS Ponta Gêa   | 71.7% | CS Dondo       | 78.3% | 14   | CS Murema      | 15   | CS Chemba      |
| CS Ponta Gêa          | 68.3% | CS Maringuê    | 78.3% | 15                 | CS Muanza      | 13   | CS Inhaminga   | CS Tica        | 66.7% | CS Canxixe     | 78.3% | 14   | CS Caia        | 15   | CS Dondo       |
| CS Chingussura        | 63.3% | HR Marromeu    | 78.3% | 16                 | CS Dondo       | 13   | CS Dondo       | CS Murema      | 61.7% | CS Caia        | 76.7% | 14   | CS Inhaminga   | 15   | CS Gorongosa   |
| CS Dondo              | 63.3% | CS Gorongosa   | 75.0% | 17                 | CS Caia        | 13   | CS Machanga    | HR Marromeu    | 60.0% | HC Beira       | 71.7% | 14   | CS Maringuê    | 15   | CS Machanga    |
| HC Beira              | 60.0% | CS Muanza      | 75.0% | 18                 | CS Gorongosa   | 13   | HR Marromeu    | CS Caia        | 48.3% | CS Gorongosa   | 70.0% | 14   | CS Canxixe     | 15   | CS Maringuê    |
| CS Machanga           | 60.0% | HR Búzi        | 71.7% | 18                 | CS Machanga    | 13   | CS Muanza      | CS Canxixe     | 48.3% | CS Maringuê    | 60.0% | 14   | HR Marromeu    | 15   | HR Marromeu    |

## Encontre a sua Unidade Sanitária na tabela para ver a progressão de 2009 para 2010!

A tabela mostra o ordenamento das US segundo a disponibilidade e concordância de dados. A mesma está dividida em dois indicadores. Para a disponibilidade, as US estão organizadas de maior a menor percentagem de disponibilidade. Para a concordância, as US estão ordenadas numericamente de primeira a última posição.

| 1as CPN              |       |                |       | DPT3-HepB-Hib        |                |      |                |                |       |                |       |      |                |    |                |
|----------------------|-------|----------------|-------|----------------------|----------------|------|----------------|----------------|-------|----------------|-------|------|----------------|----|----------------|
| % de Disponibilidade |       | Concordância   |       | % de Disponibilidade |                |      |                | Concordância   |       |                |       |      |                |    |                |
| 2009                 | 2010  | 2009           | 2010  | 2009                 | 2010           | 2009 | 2010           | 2009           | 2010  | 2009           | 2010  | 2009 | 2010           |    |                |
| CS Mazamba           | 100%  | CS Chemba      | 100%  | 1                    | CS Mazamba     | 1    | CS Galinha     | HR Búzi        | 100%  | CS Ponta Gêa   | 100%  | 1    | HR Marromeu    | 1  | CS Chemba      |
| CS Chemba            | 98.6% | CS Inharingue  | 98.6% | 2                    | HR Muxunguê    | 2    | CS Chueza      | CS Chueza      | 100%  | CS Murema      | 100%  | 1    | HR Nhamatanda  | 2  | CS Ponta Gêa   |
| CS Canxixe           | 98.6% | CS Chueza      | 98.6% | 3                    | CS Galinha     | 2    | CS Tica        | CS Bândua      | 98.6% | CS Chemba      | 100%  | 2    | CS Tica        | 2  | CS Chingussura |
| CS Galinha           | 98.6% | CS Galinha     | 98.6% | 4                    | CS Murema      | 3    | HR Muxunguê    | CS Mazamba     | 98.6% | CS Inhaminga   | 100%  | 3    | CS Caia        | 2  | CS Inhaminga   |
| HR Muxunguê          | 97.2% | CS Bândua      | 97.2% | 4                    | HR Marromeu    | 4    | CS Ponta Gêa   | HR Marromeu    | 98.6% | CS Dondo       | 100%  | 3    | CS Mazamba     | 3  | CS Machanga    |
| CS Mangunde          | 97.2% | PS Catulene    | 97.2% | 5                    | CS Bândua      | 4    | CS Murema      | HR Nhamatanda  | 98.6% | CS Machanga    | 98.6% | 4    | CS Chueza      | 4  | CS Mucodza     |
| CS Mucodza           | 95.8% | HR Muxunguê    | 95.8% | 5                    | CS Canxixe     | 5    | CS Chingussura | CS Tica        | 98.6% | HR Muxunguê    | 97.2% | 4    | CS Muanza      | 4  | HR Marromeu    |
| CS Murema            | 94.4% | CS Mangunde    | 95.8% | 6                    | CS Chemba      | 5    | CS Bândua      | CS Inharingue  | 95.8% | CS Mucodza     | 95.8% | 5    | HR Búzi        | 5  | CS Dondo       |
| CS Muanza            | 94.4% | CS Mucodza     | 95.8% | 6                    | CS Mangunde    | 5    | PS Catulene    | CS Mucodza     | 94.4% | CS Inharingue  | 95.8% | 6    | CS Bândua      | 6  | HR Búzi        |
| HR Búzi              | 93.1% | CS Tica        | 95.8% | 7                    | CS Mucodza     | 6    | CS Mangunde    | CS Maringuê    | 94.4% | CS Chingussura | 94.4% | 6    | CS Mucodza     | 6  | HR Nhamatanda  |
| CS Inhaminga         | 90.3% | CS Murema      | 94.4% | 8                    | CS Caia        | 6    | CS Inharingue  | CS Muanza      | 94.4% | CS Galinha     | 94.4% | 6    | CS Maringuê    | 7  | CS Caia        |
| CS Caia              | 88.9% | CS Mazamba     | 91.7% | 8                    | CS Maringuê    | 7    | CS Chemba      | HR Muxunguê    | 93.1% | HR Búzi        | 90.3% | 7    | CS Inharingue  | 8  | CS Bândua      |
| CS Savane            | 88.9% | HR Búzi        | 90.3% | 9                    | CS Savane      | 8    | CS Mucodza     | CS Caia        | 91.7% | PS Catulene    | 90.3% | 8    | CS Chemba      | 8  | PS Catulene    |
| CS Bândua            | 84.7% | CS Gorongosa   | 87.5% | 9                    | CS Dondo       | 9    | CS Canxixe     | CS Savane      | 91.7% | CS Chueza      | 90.3% | 8    | CS Mangunde    | 8  | CS Mangunde    |
| HR Marromeu          | 80.6% | CS Ponta Gêa   | 81.9% | 10                   | CS Inhaminga   | 10   | CS Savane      | CS Galinha     | 91.7% | CS Mazamba     | 88.9% | 8    | CS Dondo       | 9  | CS Inharingue  |
| CS Chueza            | 79.2% | CS Caia        | 80.6% | 11                   | CS Tica        | 11   | CS Gorongosa   | CS Machanga    | 88.9% | CS Tica        | 88.9% | 9    | CS Ponta Gêa   | 9  | CS Tica        |
| CS Gorongosa         | 77.8% | CS Inhaminga   | 80.6% | 12                   | HR Búzi        | 12   | HR Búzi        | CS Murema      | 87.5% | HR Nhamatanda  | 87.5% | 10   | CS Galinha     | 10 | CS Murema      |
| CS Dondo             | 75.0% | CS Canxixe     | 80.6% | 13                   | CS Ponta Gêa   | 12   | CS Mazamba     | CS Dondo       | 87.5% | CS Bândua      | 83.3% | 11   | CS Chingussura | 10 | CS Chueza      |
| CS Inharingue        | 73.6% | CS Muanza      | 80.6% | 13                   | CS Inharingue  | 13   | CS Maringuê    | CS Inhaminga   | 84.7% | CS Mangunde    | 83.3% | 11   | HR Muxunguê    | 10 | CS Galinha     |
| PS Catulene          | 70.8% | CS Savane      | 79.2% | 13                   | CS Chueza      | 14   | HR Nhamatanda  | CS Mangunde    | 84.7% | CS Maringuê    | 83.3% | 12   | CS Savane      | 11 | CS Mazamba     |
| CS Maringuê          | 70.8% | CS Chingussura | 76.4% | 14                   | CS Chingussura | 15   | CS Caia        | CS Ponta Gêa   | 80.6% | HR Marromeu    | 83.3% | 13   | CS Inhaminga   | 11 | CS Savane      |
| CS Ponta Gêa         | 66.7% | CS Machanga    | 68.1% | 15                   | HR Nhamatanda  | 15   | CS Inhaminga   | CS Chemba      | 80.6% | CS Muanza      | 83.3% | 14   | CS Machanga    | 11 | CS Gorongosa   |
| CS Chingussura       | 66.7% | CS Dondo       | 66.7% | 16                   | CS Muanza      | 15   | CS Dondo       | CS Chingussura | 77.8% | CS Caia        | 77.8% | 15   | PS Catulene    | 11 | CS Canxixe     |
| CS Tica              | 65.3% | CS Maringuê    | 66.7% | 17                   | PS Catulene    | 15   | CS Machanga    | CS Canxixe     | 77.8% | CS Savane      | 76.4% | 16   | CS Murema      | 12 | CS Maringuê    |
| HR Nhamatanda        | 62.5% | HR Marromeu    | 66.7% | 17                   | CS Gorongosa   | 15   | HR Marromeu    | CS Gorongosa   | 72.2% | CS Gorongosa   | 76.4% | 17   | CS Gorongosa   | 13 | HR Muxunguê    |
| CS Machanga          | 50.0% | HR Nhamatanda  | 65.3% | 17                   | CS Machanga    | 15   | CS Muanza      | PS Catulene    | 63.9% | CS Canxixe     | 70.8% | 17   | CS Canxixe     | 14 | CS Muanza      |

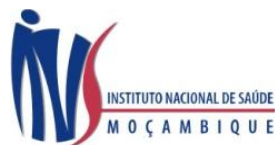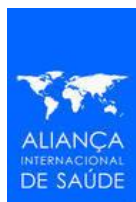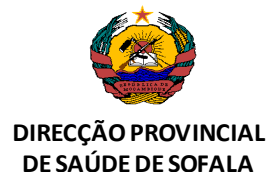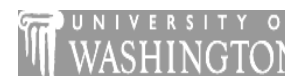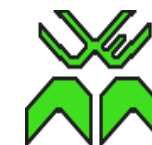

Supplement: MOESM1 [file 9532220]
